# Supplementary figures and images for: Phenotype Expansion for Atypical Gaucher Disease Due to Homozygous Missense PSAP Variant in a Large Consanguineous Pakistani Family
Source: MDPI journal article supplement (doi:10.3390/genes13040662), 2022-04-09

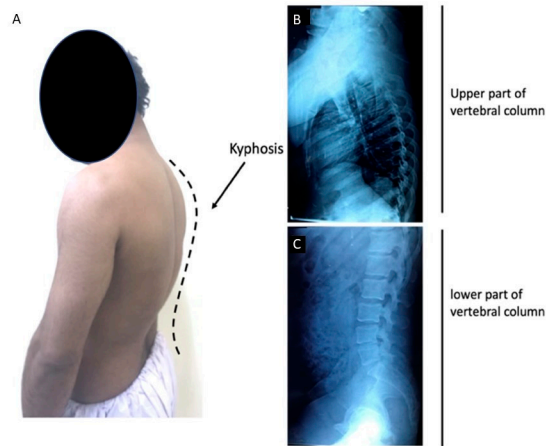

Figure S1: X-rays of vertebral column (A–C) showing kyphosis in an affected family member (IV:5).

Supplement: s1 [file s1]
